# Supplementary material for: Aberrant Gamma-Band Oscillations in Mice with Vitamin D Deficiency: Implications on Schizophrenia and its Cognitive Symptoms
Source: MDPI journal article supplement (doi:10.3390/jpm12020318), 2022-02-20
Supplement: s1 [file s1]

## Supplementary information

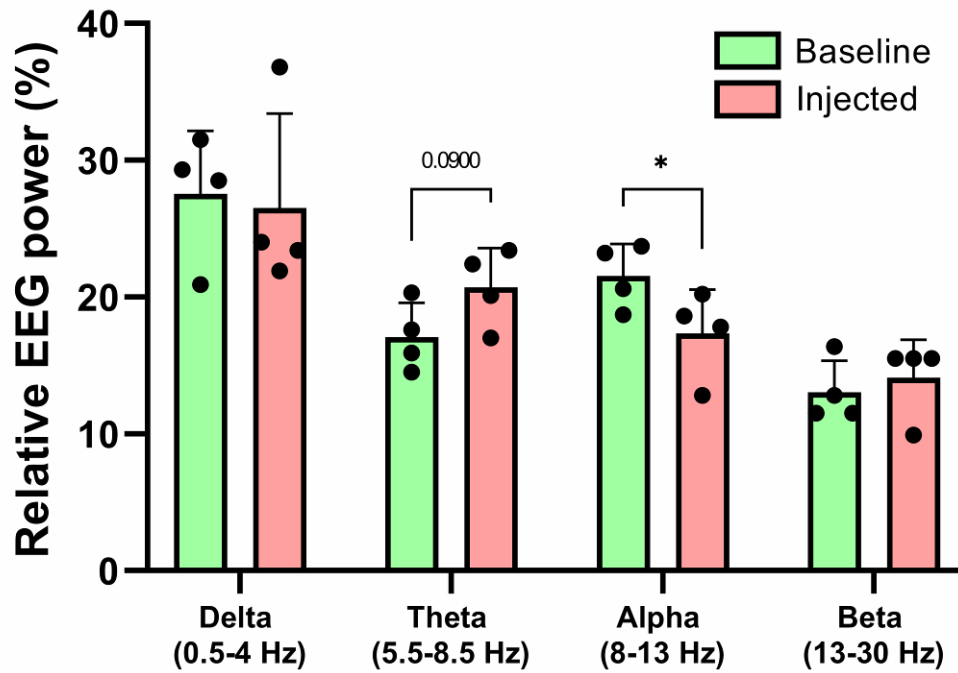

**Supplementary Figure S1.** Spontaneous brain oscillations before and after ChABC injection (Delta, Theta, Alpha, Beta). Gamma band oscillations (GBO) was shown in figure 7B. Data are expressed as mean  $\pm$  s.e.m, and \* $p < 0.05$  by Student's t-test.
